# Supplementary material
Source: PubMed Central journal article supplement (PMC8938906)
Supplement: NIHMS1783876-supplement-Appendix_1.pdf [file NIHMS1783876-supplement-Appendix_1.pdf]

# THE LANCET

## Haematology

### Supplementary appendix

This appendix formed part of the original submission and has been peer reviewed.  
We post it as supplied by the authors.

Supplement to: Kiladjian J-J, Zachee P, Hino M, et al. Long-term efficacy and safety of ruxolitinib versus best available therapy in polycythaemia vera (RESPONSE): 5-year follow up of a phase 3 study. *Lancet Haematol* 2020; published online Jan 23. [https://doi.org/10.1016/S2352-3026\(19\)30207-8](https://doi.org/10.1016/S2352-3026(19)30207-8).

**Supplementary Table 1. Summary of reasons of screen failures**

| <b>Reasons for exclusion</b>                                                                                                                                           | <b>N=120</b> |
|------------------------------------------------------------------------------------------------------------------------------------------------------------------------|--------------|
| <b>Patients meeting the following exclusion criteria</b>                                                                                                               |              |
| Active malignancy over the previous 5 years with exception as described in the study protocol and with no evidence for recurrence in the past 3 years                  | 5 (4.2%)     |
| Alcohol or drug addiction that would interfere with the ability to comply with the study requirements                                                                  | 1 (0.8%)     |
| Clinically significant bacterial, fungal, parasitic or viral infection which requires therapy or known active hepatitis A, B or C at screening or known HIV positivity | 1 (0.8%)     |
| Clinically significant cardiac disease (NYHA class III or IV)                                                                                                          | 1 (0.8%)     |
| Subject of childbearing potential who are unwilling to take appropriate precautions as described in study protocol                                                     | 2 (1.7%)     |
| Physician decision                                                                                                                                                     | 1 (0.8%)     |
| Subject decision                                                                                                                                                       | 3 (2.5%)     |
| Uncontrolled intercurrent illness or any concurrent condition that would jeopardize the safety of the subject or compliance with the protocol                          | 7 (5.8%)     |
| <b>Patients not meeting the following inclusion criteria</b>                                                                                                           |              |
| ANC $\geq 1.5 \times 10^9/L$ and PLT $\geq 100 \times 10^9/L$ at screening                                                                                             | 3 (2.5%)     |
| At least one of the following at screening: A. WBC $> 15 \times 10^9/L$ . B. PLT $> 600 \times 10^9/L$                                                                 | 14 (11.7%)   |
| Subject with/without a palpable spleen defined with volume $\geq 450 \text{ cm}^3$                                                                                     | 30 (25.0%)   |
| Two or more phlebotomies within 24 weeks of screening with at least one within 12 weeks                                                                                | 29 (24.2%)   |
| Palpable spleen $\geq 5 \text{ cm}$                                                                                                                                    | 4 (3.3%)     |
| PEG-IFN-Alpha-2A within 5 weeks of screening or having a prior history of 32P therapy                                                                                  | 1 (0.8%)     |
| Peripheral blood blast count of 0% at screening                                                                                                                        | 10 (8.3%)    |
| PV diagnosis for at least 6 months prior to screening                                                                                                                  | 4 (3.3%)     |
| Resistance or intolerance to hydroxyurea                                                                                                                               | 11 (9.2%)    |
| Stable regimen for at least 2 weeks prior to screening and no less than 4 weeks prior to randomization                                                                 | 2 (1.7%)     |

A patient may have several reasons for screening failure;

ANC, absolute neutrophil count; HIV, human immunodeficiency virus; PLT, platelet; PV, polycythemia vera; WBC, white blood corpuscle

**Supplementary Table 2. Baseline Patient Characteristics**

| <b>n (%)</b>                                                          | <b>Ruxolitinib<br/>n = 110</b> | <b>BAT<br/>n = 112</b> |
|-----------------------------------------------------------------------|--------------------------------|------------------------|
| Median age (range) — years                                            | 62.0 (34-90)                   | 60.0 (33-84)           |
| Men — %                                                               | 60.0                           | 71.4                   |
| Median time since PV diagnosis (range) — years                        | 8.2 (0.5-36)                   | 9.3 (0.5-23)           |
| Median duration of prior HU therapy (range) — years                   | 3.1 (<0.1–20.9)                | 2.8 (<0.1–20.9)        |
| ECOG performance status — %                                           |                                |                        |
| 0                                                                     | 69.1                           | 68.8                   |
| 1                                                                     | 28.2                           | 30.4                   |
| 2                                                                     | 2.7                            | 0.9                    |
| Resistance/intolerance to HU — %                                      |                                |                        |
| Intolerance                                                           | 53.6                           | 54.5                   |
| Resistance                                                            | 46.4                           | 45.5                   |
| Prior thromboembolic event — %                                        | 35.5                           | 29.5                   |
| <i>JAK2</i> V617F mutation positive — %                               | 94.5                           | 95.5                   |
| Mean allele burden (SD) — %                                           | 76.2 (17.8)                    | 75.0 (22.6)            |
| Median spleen length below costal margin (range) — cm                 | 7.00 (0.0-24.0)                | 7.00 (0.0-25.0)        |
| Spleen length < 10 cm — %                                             | 64.5                           | 59.8                   |
| Median spleen volume (range) — cm <sup>3</sup>                        | 1195 (396-4631)                | 1322 (254-5147)        |
| Mean hematocrit (SD) — % <sup>a</sup>                                 | 43.6 (2.2)                     | 43.9 (2.2)             |
| Hematocrit category — %                                               |                                |                        |
| 40%-45%                                                               | 71.8                           | 74.1                   |
| > 45%                                                                 | 25.5                           | 22.3                   |
| Mean WBC count (SD), × 10 <sup>9</sup> /L                             | 17.6 (9.6)                     | 19.0 (12.2)            |
| Mean platelet count (SD), × 10 <sup>9</sup> /L                        | 484.5 (323.3)                  | 499.4 (318.6)          |
| Median number phlebotomies in the 24 weeks prior to screening (range) | 2.0 (1.0-8.0)                  | 2.0 (0-16.0)           |

<sup>a</sup> Following HCT control period before randomization. Patients who achieved an HCT between 40% and 45% within 14 days before their day 1 visit could proceed to randomization; however, HCT at baseline may have been higher or lower.

ECOG, Eastern Cooperative Oncology Group; HCT, hematocrit; HU, hydroxyurea; PV, polycythemia vera; SD, standard deviation; WBC, white blood cells.

**Supplementary Table 3. Patient disposition at completion of the RESPONSE study (5-year final analysis)**

|                                                                                | <b>Ruxolitinib<br/>(n = 110)</b> | <b>BAT<sup>a</sup><br/>(n = 112)</b> | <b>Ruxolitinib after<br/>crossover from BAT<br/>(n = 98)</b> |
|--------------------------------------------------------------------------------|----------------------------------|--------------------------------------|--------------------------------------------------------------|
| <b>Reasons for discontinuation of treatment, n (%)</b>                         |                                  |                                      |                                                              |
| Completed treatment period                                                     | 72 (65.5)                        | 1 (0.9)                              | 64 (65.3)                                                    |
| Adverse event                                                                  | 16 (14.5)                        | 2 (1.8)                              | 16 (16.3)                                                    |
| Disease progression                                                            | 12 (10.9)                        | 1 (0.9)                              | 9 (9.2)                                                      |
| Patient decision                                                               | 6 (5.5)                          | 5 (4.5)                              | 6 (6.1)                                                      |
| Lack of efficacy                                                               | 0                                | 100 (89.3)                           | 0                                                            |
| Others (protocol deviation and/or lost to follow-up and/or physician decision) | 3 (2.7)                          | 2 (1.8)                              | 3 (3.1)                                                      |
| Death <sup>b</sup>                                                             | 1 (0.9)                          | 0                                    | 0                                                            |
| <b>Median (Interquartile range) treatment exposure, weeks</b>                  | 255<br>(158 – 256)               | 34<br>(32 – 36)                      | 220<br>(135 – 223)                                           |

<sup>a</sup> One patient was randomised to BAT but did not receive study treatment. Initial BAT included hydroxyurea (n = 66), IFN/pegylated IFN (n = 13), anagrelide (n = 8), IMiDs (n = 5), pipobroman (n = 2), and observation (n = 17).

For patients who were randomised to BAT and then crossed over to ruxolitinib, the reasons for end of BAT are reported in the “BAT” column.

<sup>b</sup> One patient in the ruxolitinib arm, determined by the investigator to have discontinued the study treatment due to AEs, died afterwards.

Abbreviations: AE, adverse event; BAT, best available therapy; IFN, interferon; IMiD, immunomodulator.

**Supplementary Table 4. Principle causes of deaths in the ruxolitinib and BAT arms**

| <b>Ruxolitinib (N = 10)</b>                   | <b>BAT (N = 9)</b>                                       |
|-----------------------------------------------|----------------------------------------------------------|
| Pneumonia (n = 1)                             | Cecal neoplasia with local ganglionic metastasis (n = 1) |
| Worsening of colon carcinoma (n=1)            | Acute myeloid leukemia (n = 1)                           |
| Unknown (n = 1)                               | Hepatorenal syndrome (n = 1)                             |
| Multiple comorbidities (n = 1)                | Disease progression (n = 1)                              |
| Gastric adenocarcinoma (n = 1)                | Pulmonary carcinoma (n = 1)                              |
| Sternal tumor invasion (n = 1)                | Shock (n = 1)                                            |
| Recurrence of breast cancer (n = 1)           | Adverse events (n = 1)                                   |
| Heart failure and atrial fibrillation (n = 1) | Study indication (n = 1)                                 |
| Acute myeloid leukemia (n = 1)                | CNS hemorrhage (n = 1)                                   |
| Multifocal metastatic lesion (n = 1)          |                                                          |

Abbreviations: BAT, best available therapy; CNS, central nervous system.

**Supplementary Table 5. Exposure-adjusted rates (per 100 patient-year) of second malignancy events**

| <b>Event</b>                                 | <b>Ruxolitinib rate per 100 patient-year of exposure</b><br>N = 110<br>Exposure = 428·4 patient-year | <b>BAT rate per 100 patient-year of exposure</b><br>N = 111<br>Exposure = 73·6 patient-year | <b>Crossover rate per 100 patient-year of exposure</b><br>N = 98<br>Exposure = 329·9 patient-year |
|----------------------------------------------|------------------------------------------------------------------------------------------------------|---------------------------------------------------------------------------------------------|---------------------------------------------------------------------------------------------------|
| <b>Number of patients (rate<sup>a</sup>)</b> | <b>All grades</b>                                                                                    | <b>All grades</b>                                                                           | <b>All grades</b>                                                                                 |
| <b>All second malignancies<sup>a,b</sup></b> | <b>30 (7·0)</b>                                                                                      | <b>3 (4·1)</b>                                                                              | <b>15 (4·5)</b>                                                                                   |
| Non-melanoma skin cancer                     | 22 (5·1)                                                                                             | 2 (2·7)                                                                                     | 9 (2·7)                                                                                           |
| Squamous cell carcinoma <sup>c</sup>         | 6 (1·4)                                                                                              | 0 (0·0)                                                                                     | 4 (1·2)                                                                                           |
| Malignant melanoma                           | 1 (0·2)                                                                                              | 1 (1·4)                                                                                     | 0 (0·0)                                                                                           |
| Prostate cancer                              | 1 (0·2)                                                                                              | 0 (0·0)                                                                                     | 2 (0·6)                                                                                           |
| Breast cancer                                | 2 (0·4)                                                                                              | 0 (0·0)                                                                                     | 0 (0·0)                                                                                           |
| Lymphoma                                     | 0 (0·0)                                                                                              | 0 (0·0)                                                                                     | 0 (0·0)                                                                                           |
| <b>Disease progression<sup>d</sup></b>       |                                                                                                      |                                                                                             |                                                                                                   |
| Acute myeloid leukemia                       | 1 (0·2)                                                                                              | 0 (0·0)                                                                                     | 2 (0·6)                                                                                           |
| Myelofibrosis                                | 9 (2·1)                                                                                              | 1 (1·4)                                                                                     | 6 (1·8)                                                                                           |

<sup>a</sup> Adjusted rates were calculated as the number of events per 100 patient-years of exposure.

<sup>b</sup> Events occurring in  $\geq 0\cdot5\%$  of patients in any group.

<sup>c</sup> All events were squamous cell carcinoma of the skin, including the region of parotid gland. No case of metastatic disease was reported.

<sup>d</sup> Events occurring in  $\geq 1$  patient(s) in any group.

Abbreviation: BAT, best available therapy.

**Supplementary Table 6. Exposure-adjusted rates (per 100 patient-year) of non-melanoma skin cancer events by prior history of malignancy status**

| Non-melanoma skin cancer events <sup>a,b</sup> | Ruxolitinib rate per 100 patient-year of exposure<br>N = 110<br>Exposure = 428·4 patient-year |                 | BAT rate per 100 patient-year of exposure<br>N = 111<br>Exposure = 73·6 patient-year |                 | Crossover rate per 100 patient-year of exposure<br>N = 98<br>Exposure = 329·9 patient-year |                 |
|------------------------------------------------|-----------------------------------------------------------------------------------------------|-----------------|--------------------------------------------------------------------------------------|-----------------|--------------------------------------------------------------------------------------------|-----------------|
|                                                | No<br>(n = 97)                                                                                | Yes<br>(n = 13) | No<br>(n = 105)                                                                      | Yes<br>(n = 6)  | No<br>(n = 92)                                                                             | Yes<br>(n = 6)  |
| Patient-year of exposure                       | 385·3                                                                                         | 43·0            | 70·1                                                                                 | 3·5             | 307·5                                                                                      | 22·4            |
| <b>Total events</b>                            | <b>14 (3·6)</b>                                                                               | <b>8 (18·6)</b> | <b>1 (1·4)</b>                                                                       | <b>1 (28·5)</b> | <b>6 (2·0)</b>                                                                             | <b>3 (13·4)</b> |
| Basal cell carcinoma                           | 10 (2·6)                                                                                      | 7 (16·3)        | 1 (1·4)                                                                              | 0 (0·0)         | 4 (1·3)                                                                                    | 1 (4·5)         |
| Squamous cell carcinoma of skin                | 5 (1·3)                                                                                       | 4 (9·3)         | 0 (0·0)                                                                              | 0 (0·0)         | 3 (1·0)                                                                                    | 1 (4·5)         |
| Squamous cell carcinoma <sup>b</sup>           | 3 (0·8)                                                                                       | 3 (7·0)         | 0 (0·0)                                                                              | 0 (0·0)         | 2 (0·7)                                                                                    | 2 (8·9)         |
| Bowen's disease                                | 1 (0·3)                                                                                       | 1 (2·3)         | 0 (0·0)                                                                              | 1 (28·5)        | 0 (0·0)                                                                                    | 0 (0·0)         |
| Carcinoma in situ of skin                      | 0 (0·0)                                                                                       | 2 (4·6)         | 0 (0·0)                                                                              | 0 (0·0)         | 0 (0·0)                                                                                    | 0 (0·0)         |
| Metastatic squamous cell carcinoma             | 0 (0·0)                                                                                       | 2 (4·6)         | 0 (0·0)                                                                              | 0 (0·0)         | 0 (0·0)                                                                                    | 0 (0·0)         |
| Keratoacanthoma                                | 1 (0·3)                                                                                       | 0 (0)           | 0 (0·0)                                                                              | 0 (0·0)         | 0 (0·0)                                                                                    | 0 (0·0)         |

<sup>a</sup> Adjusted rates were calculated as the number of events per 100 patient-years of exposure.

<sup>b</sup> All events were squamous cell carcinoma of the skin, including the region of parotid gland. No case of metastatic disease was reported.

Abbreviation: BAT, best available therapy.

Supplementary Figure 1. RESPONSE study design

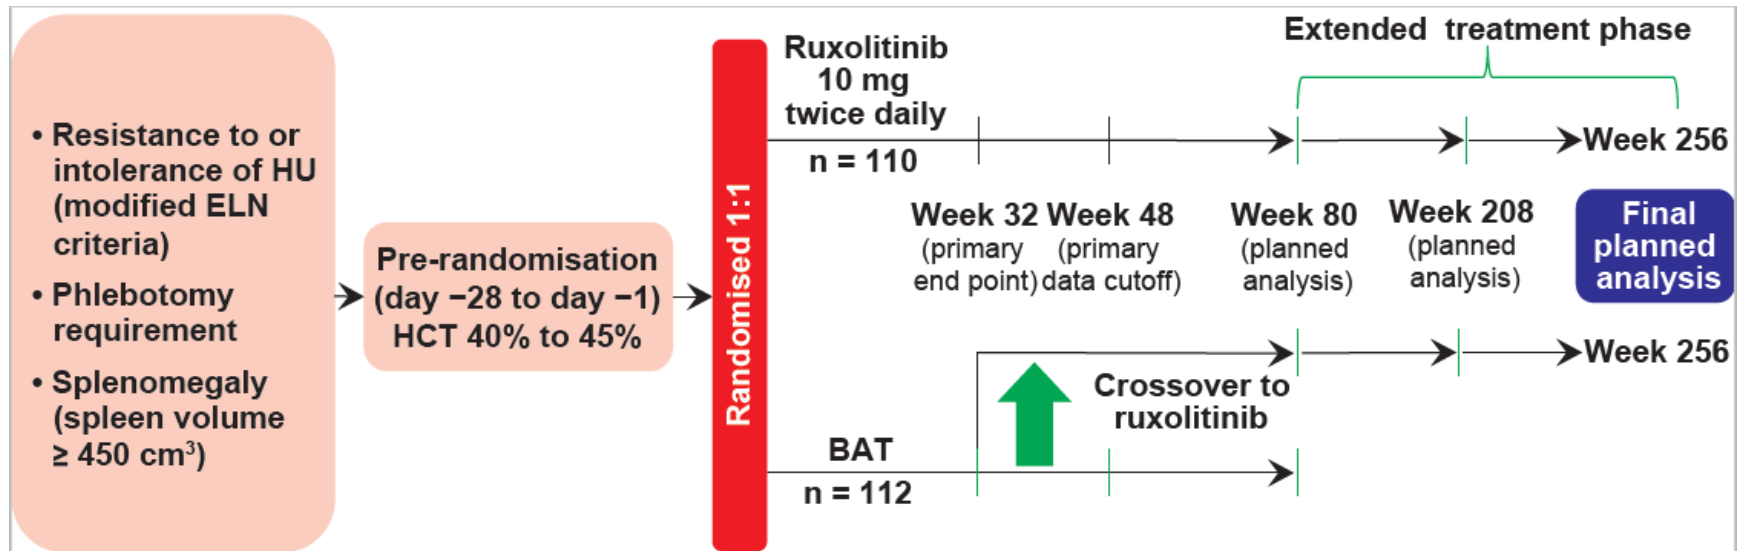

Abbreviations: BAT, best available therapy; ELN, European LeukemiaNet; HCT, haematocrit; HU, hydroxyurea.



Supplementary Figure 2. Durability of hematocrit control with ruxolitinib

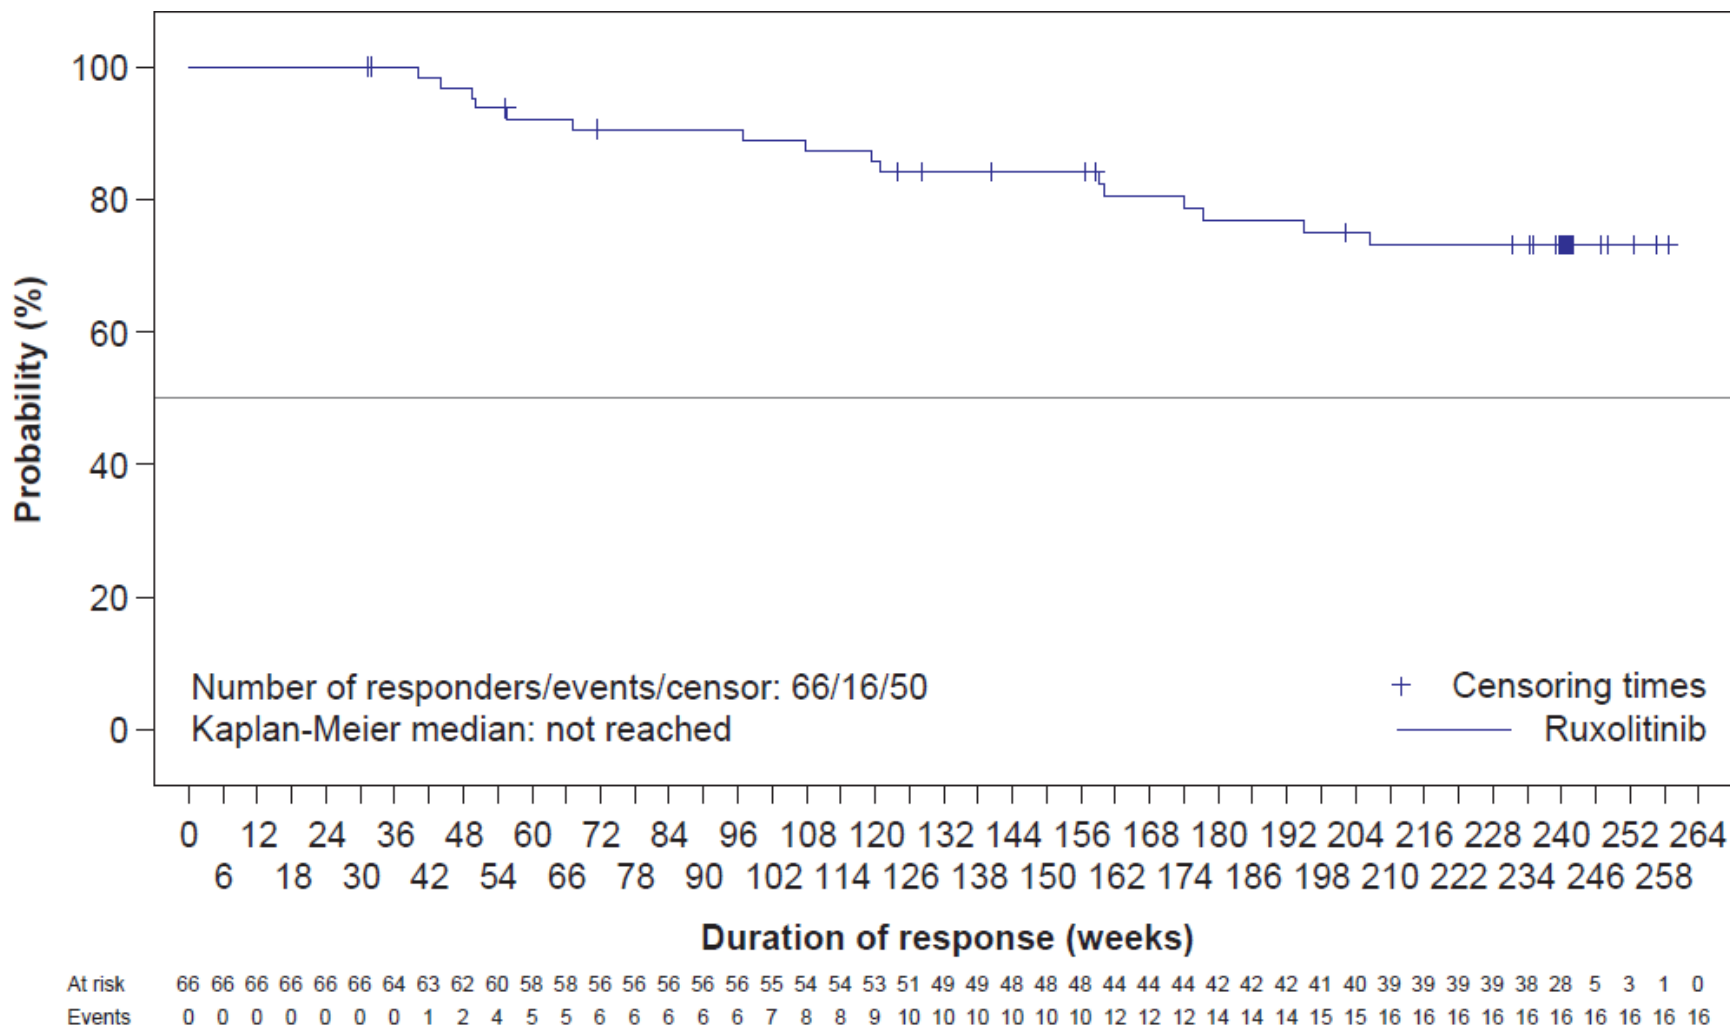

Supplementary Figure 3: Number of phlebotomy procedures over time in ruxolitinib-treated patients

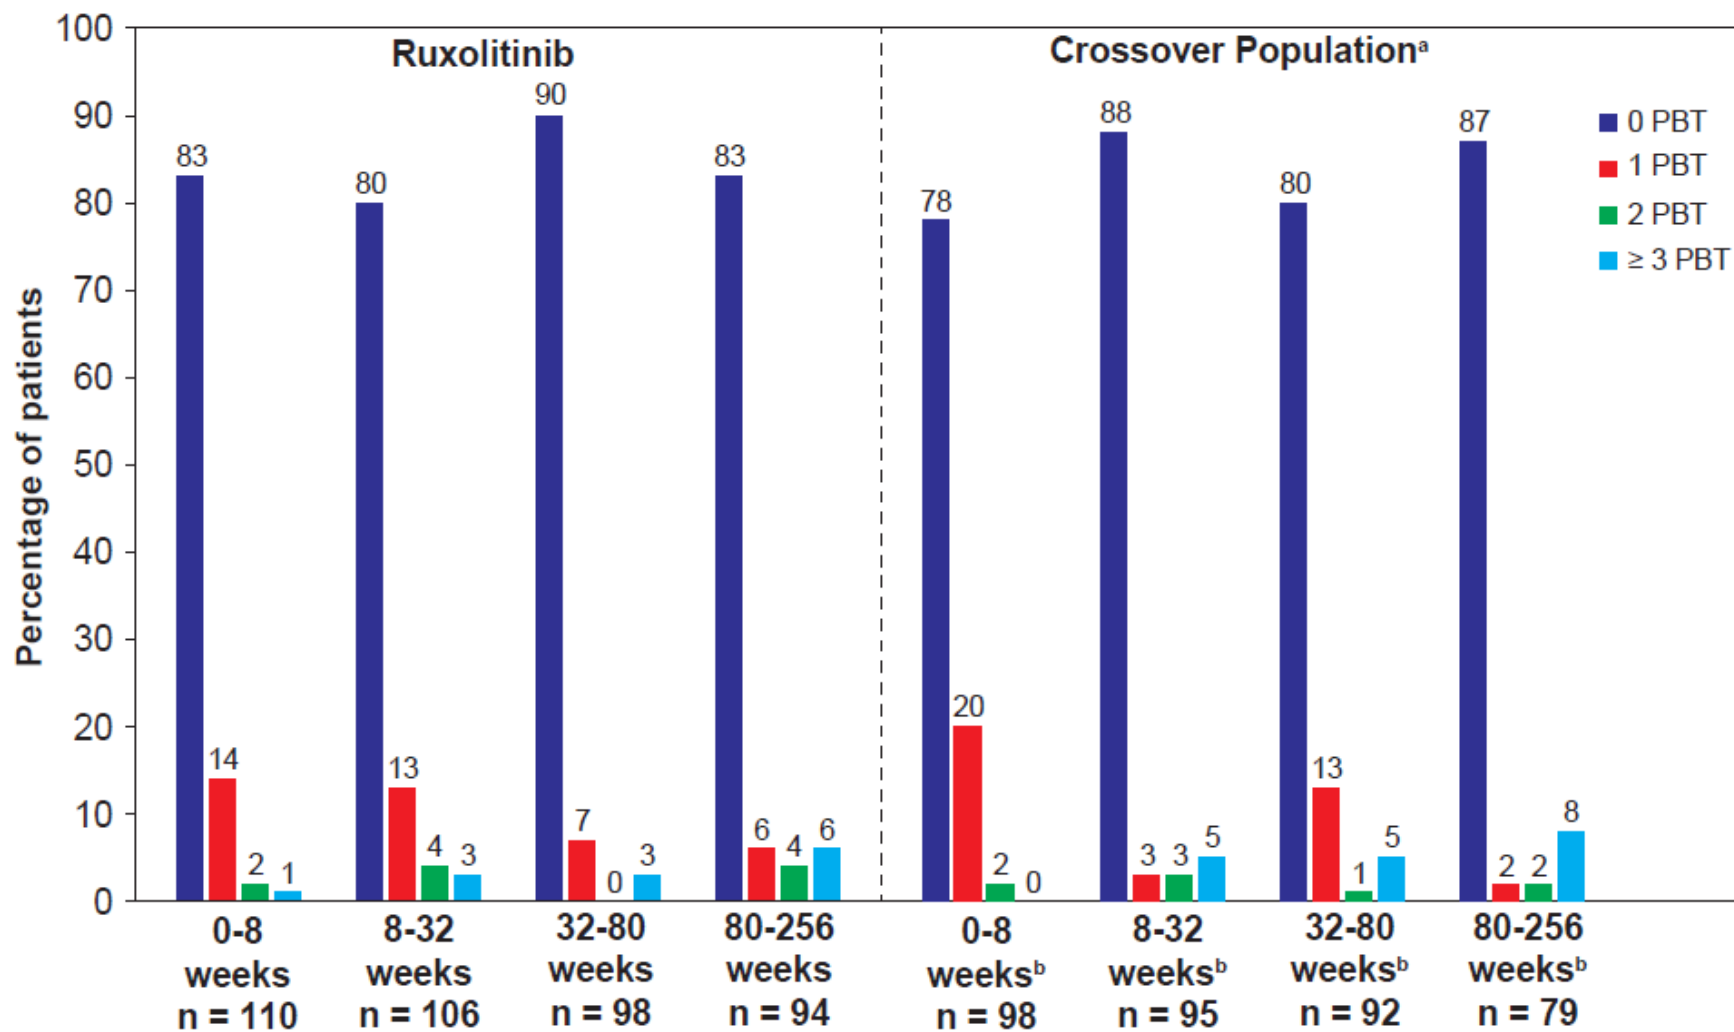

<sup>a</sup>All patients who crossed over from BAT. <sup>b</sup>From the time of crossover.

BAT, best available therapy; PBT, phlebotomy.

Supplementary Figure 4. Durability of spleen response with ruxolitinib

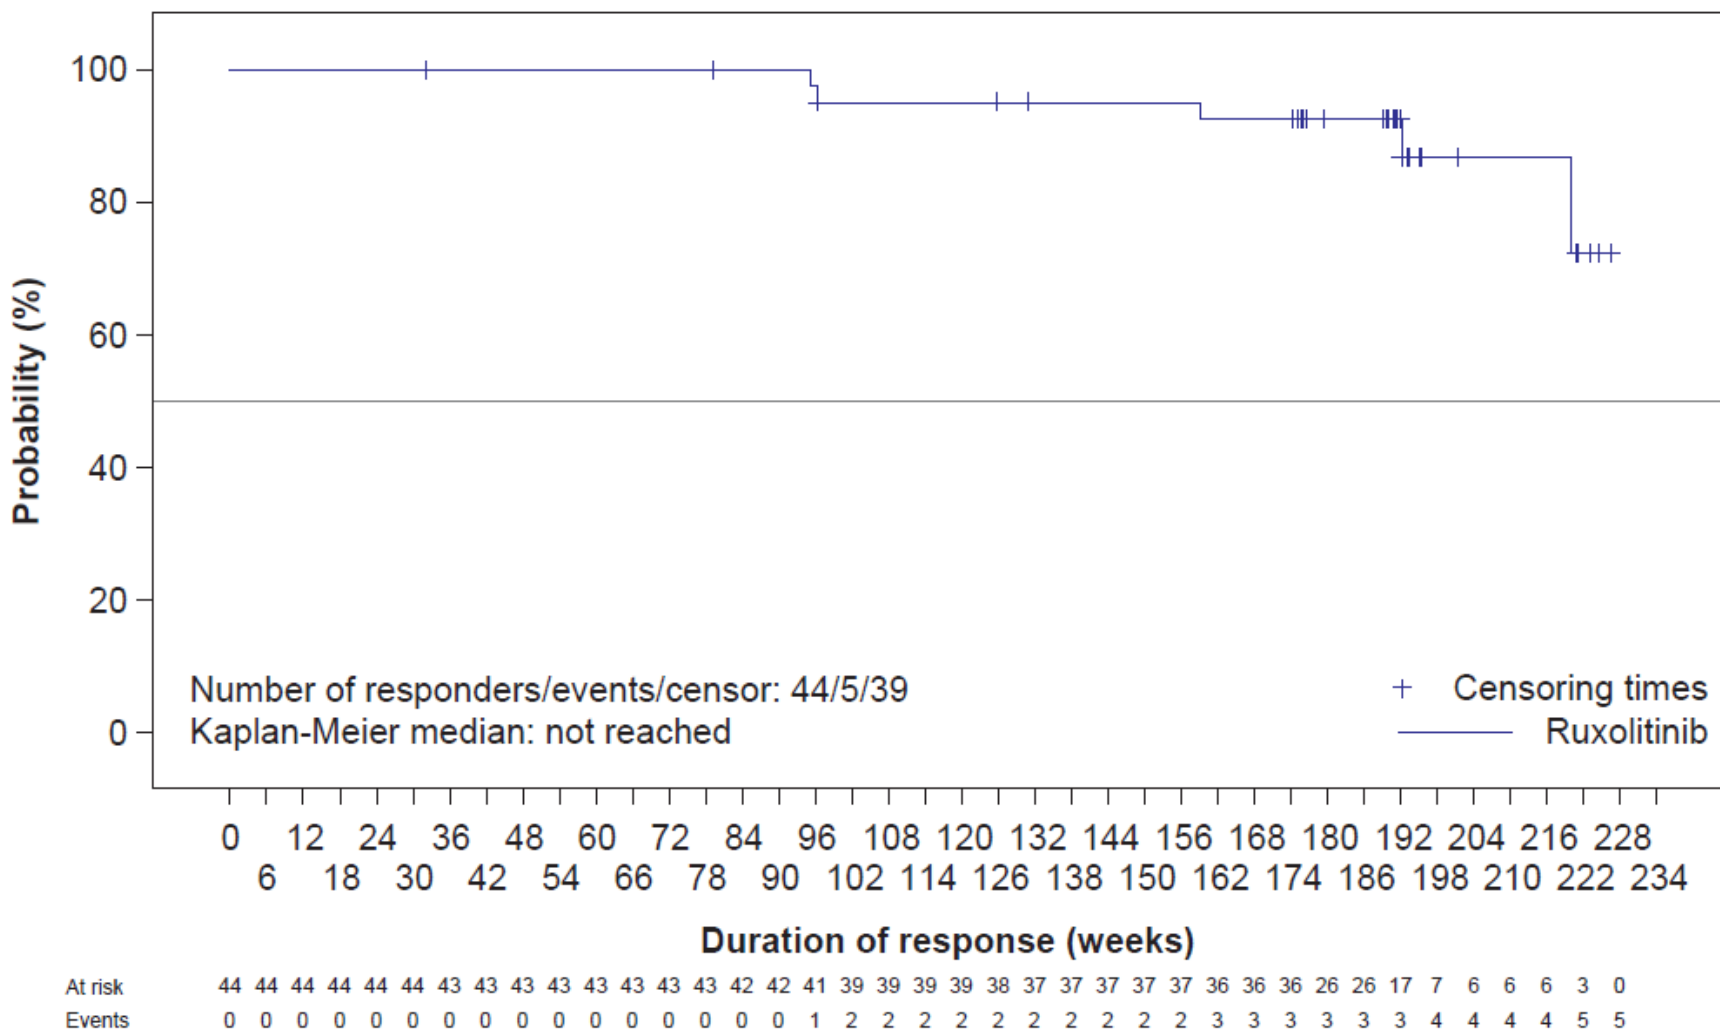

Supplementary Figure 5. Best percentage change from baseline in spleen volume

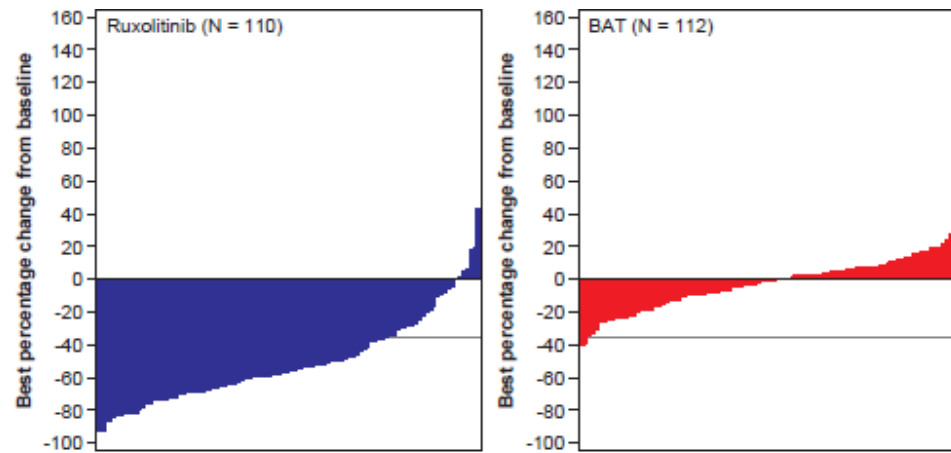

| Treatment:                                  | Ruxolitinib | BAT        |
|---------------------------------------------|-------------|------------|
| Decrease in percentage change from baseline | 89.1% (98)  | 49.1% (55) |
| Increase in percentage change from baseline | 5.5% (6)    | 43.8% (49) |
| No change from baseline                     | 0.0% (0)    | 0.0% (0)   |
| Missing baseline or post baseline           | 5.5% (6)    | 7.1% (8)   |

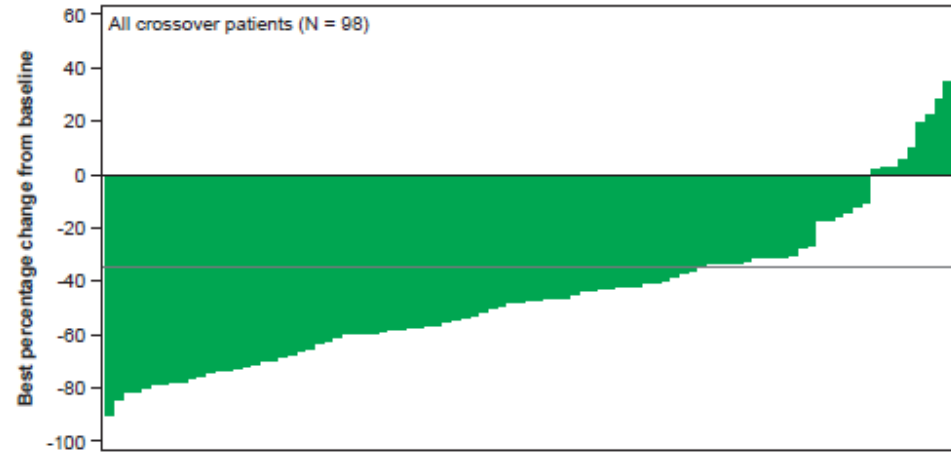

|                                               |            |
|-----------------------------------------------|------------|
| Decrease in percentage change from baseline   | 85.7% (84) |
| Increase in percentage change from baseline   | 10.2% (10) |
| No change from baseline                       | 0.0% (0)   |
| Missing baseline or post baseline             | 4.1% (4)   |
| Achieving $\geq 35\%$ reduction from baseline | 66.3% (65) |

Abbreviations: BAT, best available therapy.

**Supplementary Figure 6. Reduction in JAK2 V617F allele burden from baseline over time**

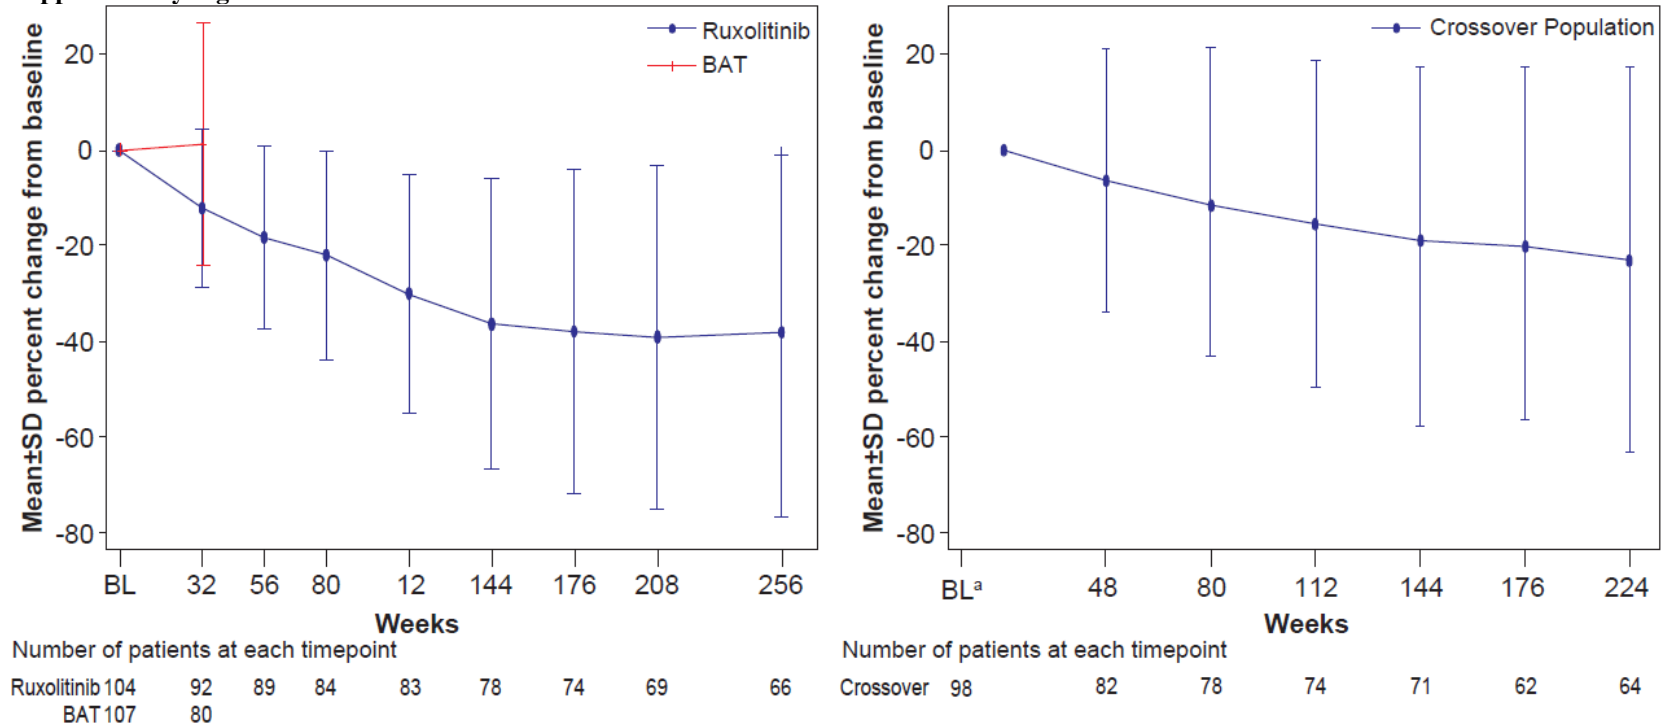

<sup>a</sup>Defined as the last assessment prior to first dose of ruxolitinib crossover treatment

BAT, best available therapy; BL, baseline; SD, standard deviation.

Supplementary Figure 7. Pruritus Symptom Impact Scale over time in patients originally randomized to ruxolitinib

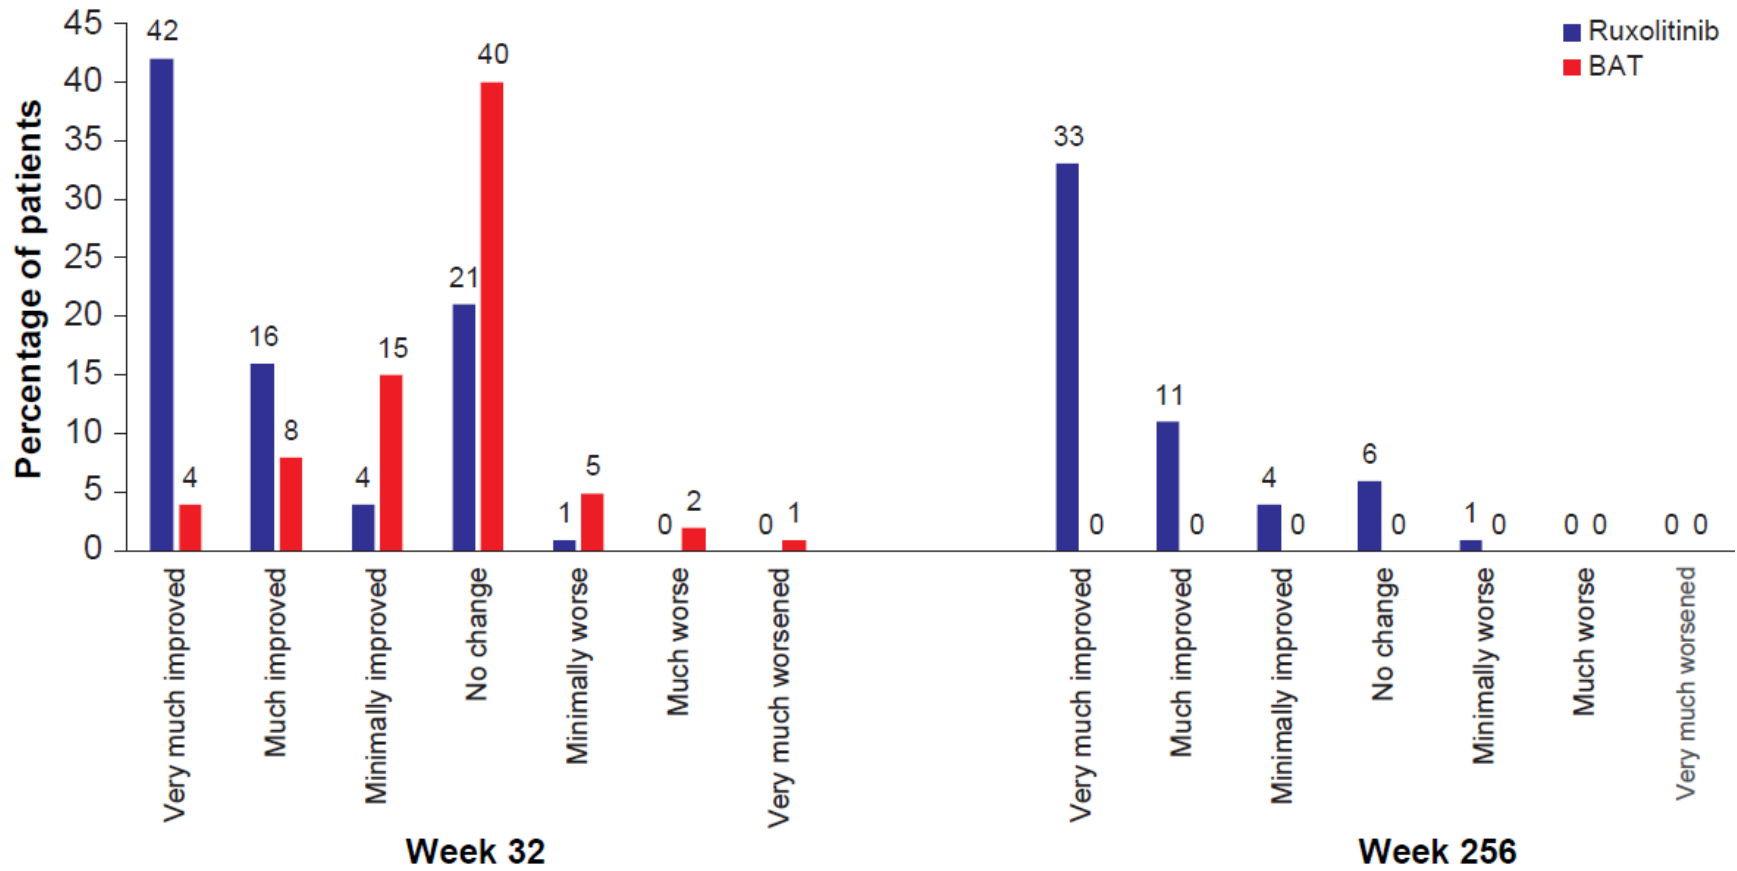

Abbreviations: BAT, best available therapy.

Supplementary Figure 8. EORTC QLQ-C30 global health status–quality of life scale in patients originally randomized to ruxolitinib

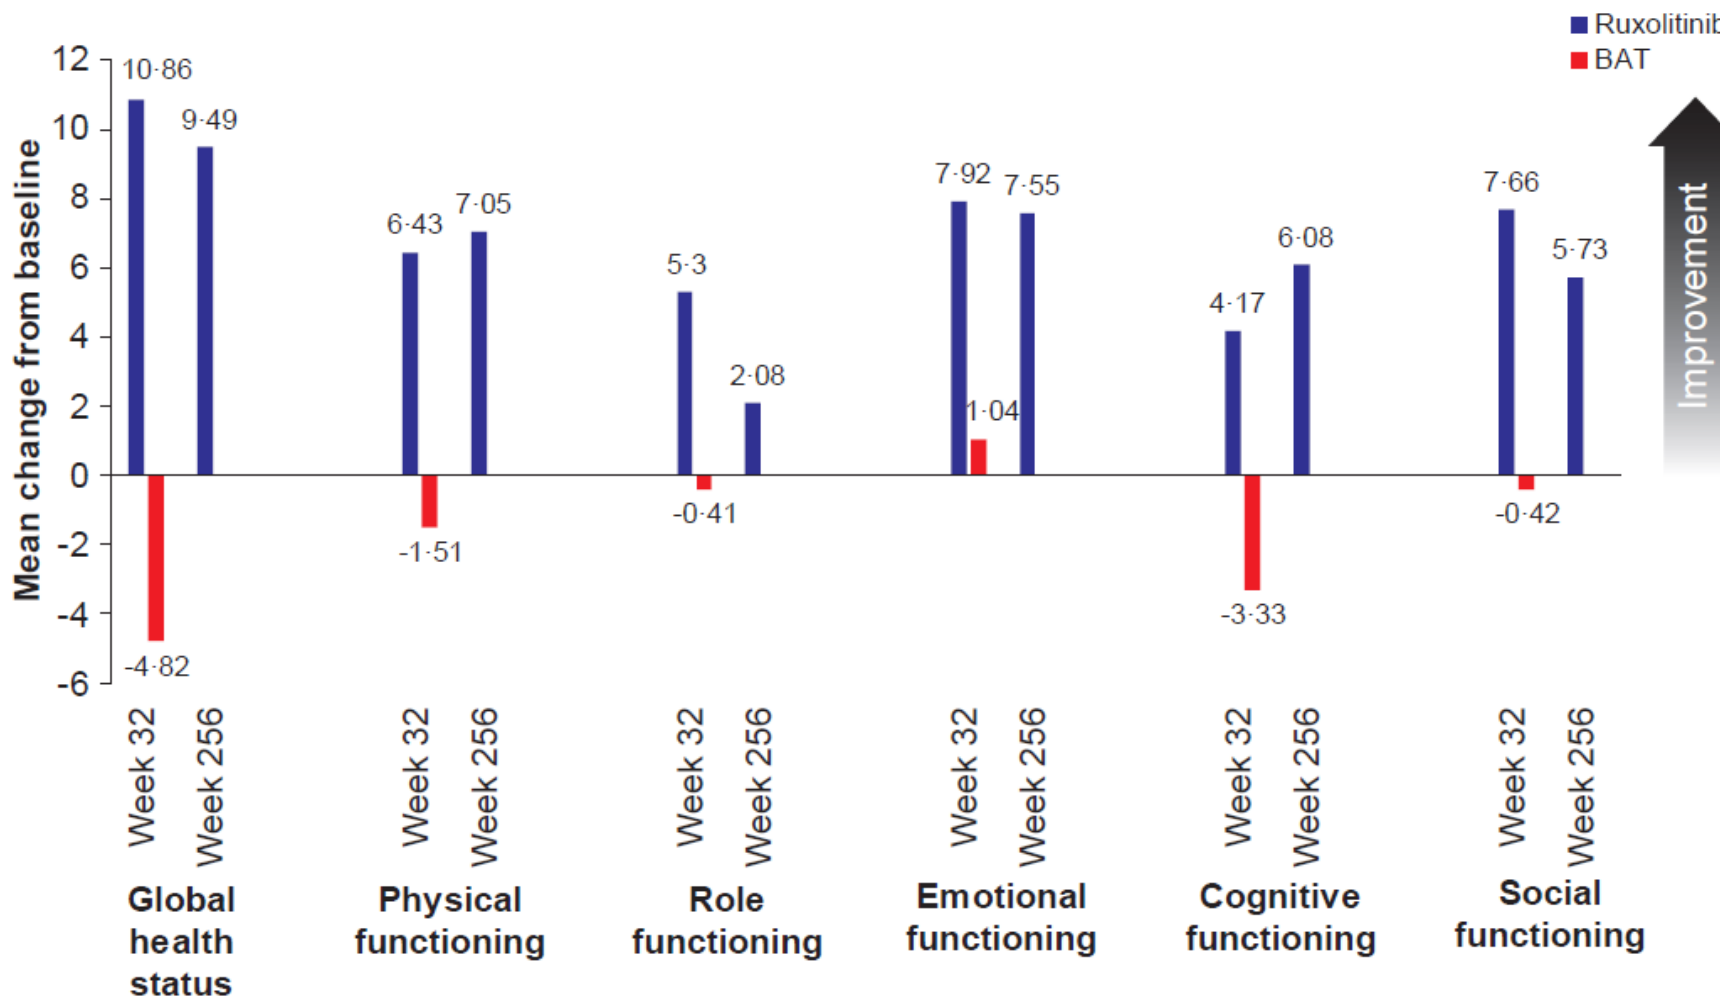

Abbreviations: BAT, Best available therapy; EORTC QLQ-C30, the European Organization for the Research and Treatment of Cancer core quality of life questionnaire.

## **RESPONSE study sites and investigators**

**Australia:** *Royal Brisbane Hospital, Brisbane—S. Durrant; Royal Melbourne Hospital, Parkville—A. Bajel; Tweed Hospital, Tweed Heads—E. Abdi;* **Belgium:** *Cliniques Universitaires Saint-Luc Bruxelles—L. Knoops; Gasthuisberg University Hospital, Leuven—T. Devos; AZ Sint-Jan, Brugge—J. Van Droogenbroeck; ZNA Stuivenberg Hematology and Oncology, Antwerp—P. Zachee;* **Canada:** *Sunnybrook Health Sciences Center, Toronto, ON—J. Callum; Princess Margaret Hospital, Toronto, ON—V. Gupta; Juravinski Cancer Clinic, Hamilton, ON—B. Leber; Jewish General Hospital, Montreal, QC—J. Prchal;* **France:** *Hospital Saint Louis, Paris—J.-J. Kiladjian; CHU de Brest—Hopital Morvan Brest Cedex—J.-C. Ianotto; Hospital Saint Vincent Lille Cedex—N. Cambier; Center Hospitalier d’Avignon, Avignon—B. Slama; CHU Nancy-Brabois, Vandoeuvre Les Nancy—D. Ranta; Hospital Hotel Dieu, Nantes—V. Dubruille; Centre Hospitalier de la Cote Basque, Bayonne—F. Bauduer;* **United States:** *Florida Pulmonary Research Institute, Winter Park, FL—F. Fakih; Gabrail Cancer Center Research, Canton, OH—N. Gabrail; Alabama Oncology, Birmingham, AL—J. Harvey; Palm Beach Institute of Hematology and Oncology, Boynton Beach, FL—E. Meiri; Mayo Clinic Arizona, Scottsdale, AZ—R. Mesa; Saint Agnes Hospital, Baltimore, MD—C. Miller; Fred Hutchinson Cancer Research Center, Seattle, WA—B. Scott; Houston Cancer Institute, Houston, TX—M. Scouros; Sierra Hematology and Oncology, Sacramento, CA—C. Spears; Providence Cancer Institute, Southfield, MI—H. Terebelo; The University of Texas MD Anderson Cancer Center, Houston, TX—S. Verstovsek; Achieve Clinical Research LLC, Birmingham, AL—A. Yeilding; Regional Cancer Care Associated LL Somerset Division, Somerville, NJ—S. Young; Washington University School of Medicine, St Louis, MO—S. Oh; Medical University of South Carolina, Charleston, SC—L. Afrin; New Hope Cancer and Research Institute, Pomona, CA—V. Agarwal; Northwestern University Feinberg School of Medicine, Chicago, IL—B. Stein; Sarah Canon Research Institute, Nashville, TN—J. Berdeja; Hematology-Oncology Associates of Northern New Jersey and Carol G. Simon Cancer Center, Morristown, NJ—M. Scola; University of Nebraska Medical Center, Omaha, NE—M. Akhtari and S. Rajan; Florida Cancer Specialists, Fort*



Myers, FL—M.-J. McCleod; *Cancer Center of Acadiana at Lafayette General, Lafayette, LA*—L. Meza; *Capitol Comprehensive Cancer Care Clinic, Jefferson, MO*—A. Khojasteh; *University of Florida College of Medicine at Jacksonville, Jacksonville, FL*—N. Latif; *Sharp Clinical Oncology Research, San Diego, CA*—A. Saleh; *Maine Center for Cancer Medicine and Blood Disorders, Scarborough, ME*—H. Ryan; *Oncology Associates of Bridgeport, Trumbull, CT*—D. Witt; *Geisinger Medical Center Cancer Center Hazelton, Hazelton, PA*—P. Roda; *Maryland Oncology Hematology, P.A., Columbia, MD*—E. Lee; *Cancer Centers of the Carolinas, Greenville, SC*—J. Walls; *Saint Alphonsus Regional Medical Center, Boise, ID*—K. Pulver; *Commonwealth Hematology-Oncology, PC, Lawrence, MA*—P. Sanz-Altamira; **Germany:** *Univ-Klinilum Mannheim Theodor-Kutzer Ufer 1, Mannheim*—E. Lengfelder; *Universitätsklinikum Aachen, Aachen*—T. Brümmendorf; *Friedrich-Schiller Universitätsklinikum Jena*—A. Hochhaus; *Johannes Wesling Klinikum Minden, Minden*—M. Griesshammer; *Klinikum Rechts der Isar der TU Munchen, Munchen*—P. Jost and J. Duyster; *Univ-Klinik Magdeburg, Magdeburg*—F. Heidel; *Universitätsklinikum Ulm, Ulm*—K. Döhner; *Universitätsklinikum Hamburg Eppendorf, Hamburg*—P. Schafhausen; *Charite Berlin Campus Benjamin Franklin, Berlin*—I. Blau; *Universitätsklinik Albert-Ludwigs-Uni-Freiburg, Freiburg*—C. Waller; *Universitätsklinikum Bonn, Bonn*—D. Wolf; **Hungary:** *Markosovszky Egyetemi Oktatókórház, Szombathely*—L.-J. Ivanyi; *Szegedi Tudományegyetem, Szeged*—Z. Borbenyi; *Bacs-kiskun Megyei Onkormányzat Kórháza, Kecskemet*—G. Pajkos; *Fov Onk Egyesített Szent István és Szent László Kórház, Budapest*—T. Masszi; **Italy:** *Az Osp Universit Careggi—Univ Studi di Firenze, Firenze*—A.-M. Vannucchi and P. Guglielmelli; *Fondazione IRCC Policlinico S Matteo Univ degli Studi Pavia, Pavia*—M. Cazzola; *Az Sanit Osp Univ S Luigi Gonzaga di Orbassano Regione Gonzole, Univ degli Studi di Torino, Orbassano*—D. Cilloni; *AOU Policlinico Umberto I Univers La Sapienza, Roma*—A. Tafuri and G. Alimena; *Presidio Ospedaliero S Bortolo ULSS 6 Vicenza, Vicenza*—F. Rodeghiero; *Az Osp Univ Consorziale Policlin di Bari Univ degli Studi, Bari*—G. Specchia; *AO Bianchi Melacrino Morelli—Presidio Ospedali Riuniti, Reggio Calabria*—F. Nobile; *Fondazione IRCCS Policlinico San Matteo, Pavia*—V. Rosti and G. Barosi; *Papa Giovanni XXIII*

*Bergamo—A. Rambaldi; Az Osp di Bologna Policlinico S Orsola–Malpighi Univ degli Studi, Bologna—M. Cavo and M. Baccarani; AO Osp di Circolo e Fond Macchi–Polo Univ Pr Osp di Varese, Varese—F. Passamonti and D.D. Caramazza; A Osped–Universit Policlinico Federico II Univ degli Studi, Napoli—F. Pane; Az Ospedariela Niguarda Ca’ Granda, Milano—E. Pungolino; **Korea:** Severance Hospital, Seoul—Y. Min; Seoul St Mary’s Hospital, Seoul—B. Cho; the **Netherlands:** Erasmus MC/Centrumlocatie, Rotterdam—P.A.W. te Boekhorst; Medische Spectrum Twente Enschede—W.M. Smit; **Spain:** Hospital del Mar Barcelona, Cataluna—C. Besses Raebel; Hospital Universitario Doctor Negrin Las Palmas de Gran Canaria, Las Palmas de GC—M.-T. Gomez Casares; Hospital Clinico Universitario Sanitiago De Compostela, Valencia, Comunidad Valeniana—J.-C. Hernandez Boluda; Complejo Hospitalario de Navarra, Pamplona, Navarra—E. Olavarria Lopez; Hospital 12 de Octubre, Madrid—J. Martinez Lopez; Hospital Virgen de La Victoria, Malaga, Andalucia—M.-P. Queipo de Llano Temboury and S. Del Castillo; Antes Hospital Juan Canalejo, La Coruna, Galicia—C. Fernandez Lago; Hospital Universitario de Salamanca, Salamanca, Castilla Y Leon—J.-M. Hernandez Rivas; **Turkey:** Ege University Medical Faculty Hospital, Izmir—G. Saydam; Hacettepe University Medical Faculty, Ankara—I. Haznedaroglu; Istanbul University, Istanbul Medical Faculty, Istanbul—A. Yavuz; **United Kingdom:** Guy’s Hospital, London—C. Harrison; Cardiff University Hospital, Cardiff, Wales—S. Knapper; Royal Bournemouth Hospital, Bournemouth—J. Chacko; **Russia:** Research Institute of Hematology and Transfusionology of Federal Agency of High-Technology Medical Care, St Petersburg—K. Abdoukadyrov; Institute of Cardiology and Endocrinology, St Petersburg—A. Zaritsky; Hematological Scientific Center of RAMS, Moscow—M. Sokolova and N. Khoroshko; **Japan:** University of Yamanashi Hospital, Chuo-city, Yamanashi—K. Kirito; Japanese Red Cross Medical Center, Shibuya, Tokyo—K. Suzuki; Osaka City University Hospital, Osaka-City, Osaka—M. Hino; Chiba University Hospital, Chiba-city, Chiba—M. Takeuchi; Japanese Red Cross Nagoya Daiichi Hospital, Ngoya, Aichi—K. Miyamura; Gunma University Hospital, Maebashi-City, Gunma—H. Handa; Keio University Hospital, Shinjuku-ku, Tokyo—S. Okamoto; **Thailand:** Siriraj hospital, Bangkok—S. Issaragrisil; **Argentina:** Hospital Ramos Mejia*

*CABA, Buenos Aires—B. Moiraghi; **China:** Jiangsu Province Hospital, Nanjing, Jiang Su—J. Li; Peking Union Medical College Hospital, Beijing, Beijing—D. Zhou; First Affiliated Hospital Zhejiang Medical University, Hangzhou, Zhejiang—J. Jin*
